# Supplementary material for: Short term colour vision plasticity on the reef: Changes in opsin expression under varying light conditions differ between ecologically distinct reef fish species
Source: Oxford University Press journal article supplement (doi:10.1242/jeb.175281), 2018-01-01
Supplement: jeb175281supp.pdf [file jeb175281supp.pdf]

**Table S1:** Overview of numbers of specimens used per light treatment and per sampling timepoint. Timepoint 0 = Start of experiment; Timepoint 1 = 1 month; Timepoint 2 = 4 months (*O. cyanosoma*) / 6 months (*P. moluccensis*, *P. amboinensis*).

| Species               | Treatment |      |   |       |   |     |   |           |     |        |     |       |     |
|-----------------------|-----------|------|---|-------|---|-----|---|-----------|-----|--------|-----|-------|-----|
|                       | Baseline  | Blue |   | Green |   | Red |   | No Filter |     | ND0.15 |     | ND0.6 |     |
|                       | 0         | 1    | 2 | 1     | 2 | 1   | 2 | 1         | 2   | 1      | 2   | 1     | 2   |
| <i>O. cyanosoma</i>   | 18        | 8    | 8 | 7     | 5 | 8   | 5 | 6         | n/a | 10     | n/a | 7     | n/a |
| <i>P. moluccensis</i> | 18        | 3    | 3 | 3     | 5 | 3   | 9 | 6         | n/a | 6      | n/a | 5     | n/a |
| <i>P. amboinensis</i> | 8         | 5    | 5 | 13    | 5 | 4   | 5 | n/a       | n/a | n/a    | n/a | n/a   | n/a |

**Table S2:** Primer names and sequences used for PCR and sequencing of the pool of opsins for *O. cyanosoma*; and summary of qPCR primer combinations and efficiencies for each species. Primer names and sequences for *P. amboinensis* and *P. moluccensis* were obtained from Stieb et al. (2016).

| opsin                           | species                                                | primer pool              | sequence                        |
|---------------------------------|--------------------------------------------------------|--------------------------|---------------------------------|
| <b>SWS2A<math>\alpha</math></b> | <i>O. cyanosoma</i>                                    | pSWS2AA_F1               | 5'-GCCATGGCTAACCTCATTGT-3'      |
|                                 |                                                        | pSWS2AA_R4               | 5'-TTTGGAGACTTCAGTTACTGATGCT-3' |
| <b>SWS2A<math>\beta</math></b>  | <i>O. cyanosoma</i>                                    | pSWS2AB_F3               | 5'-AACTTGGCCTTTTCCAACCT-3'      |
|                                 |                                                        | pSWS2AB_R5               | 5'-ACTTCAGTCACCGACTGG-3'        |
| <b>RH2B</b>                     | <i>O. cyanosoma</i>                                    | pRH2B_F3                 | 5'-CTCCGGCAACCTCTGAACCT-3'      |
|                                 |                                                        | pRH2B_R3                 | 5'-GTATGGGGTCCAAGCAACAA-3'      |
| <b>RH2A</b>                     | <i>O. cyanosoma</i>                                    | pSWS2AB_R5               | 5'-GGCAACCGCTGAACTACATC-3'      |
|                                 |                                                        | pRH2A_R1                 | 5'-AGCCAAAGACCATCAAGACG-3'      |
| <b>LWS</b>                      | <i>O. cyanosoma</i>                                    | pLWS_F1                  | 5'-TCAGCGTATGCAACCAGTTC-3'      |
|                                 |                                                        | pLWS_R1                  | 5'-GGCATATCCAGGGTTAGCAG-3'      |
| <b>RH1</b>                      | <i>O. cyanosoma</i>                                    | pRH1_F2                  | 5'-GCGTTGTCCGGAGTCCTTAT-3'      |
|                                 |                                                        | pRH1_R2                  | 5'-TCCACATGAGCACTGCATTC-3'      |
| opsin                           | species with primer efficiencies (%)                   | primer qPCR              | sequence                        |
| <b>SWS1</b>                     | <i>P. amboinensis</i> (90), <i>P. moluccensis</i> (94) | SWS1_forward_1           | 5'-CTCCAAGAGCTCCTGCGTCT-3'      |
|                                 |                                                        | SWS1_reverse_1           | 5'-TGATGCAGGCGTTGAACTGTTTG-3'   |
| <b>SWS2B</b>                    | <i>P. amboinensis</i> (91), <i>P. moluccensis</i> (91) | SWS2B_forward_1          | 5'-GGTGAAAGCGGTAGCAAAGG-3'      |
|                                 |                                                        | SWS2B_reverse_1          | 5'-CCATCTTGGTCACCTCCCCTC-3'     |
| <b>SWS2A<math>\alpha</math></b> | <i>O. cyanosoma</i> (103)                              | SWS2AA_F3                | 5'-ATAAACAGTTCCGTGGGTGCATGAT-3' |
|                                 |                                                        | SWS2AA_R3                | 5'-TTGGAGACTTCAGTTACTGATGCTG-3' |
| <b>SWS2A<math>\beta</math></b>  | <i>O. cyanosoma</i> (100)                              | SWS2AB_F1                | 5'-TAACGCTTGGTGGGATGGTGAG-3'    |
|                                 |                                                        | SWS2AB_R1                | 5'-GCTAAAGCGTGGTCAGTTTGAAC-3'   |
| <b>RH2B</b>                     | <i>P. amboinensis</i>                                  | RH2B_forward_1           | 5'-GGTGGGCTATTTCTCCTTGGG-3'     |
|                                 |                                                        | RH2B_forward_2           | 5'-GATGGGCTATTTCTCCTTGGGG-3'    |
|                                 | <i>P. amboinensis</i> (93), <i>P. moluccensis</i> (96) | RH2B_reverse_1           | 5'-CACAGAGACTTGACCTCCG-3'       |
|                                 |                                                        | <i>O. cyanosoma</i> (95) | RH2B_F1                         |
| RH2B_R5                         | 5'-ACTTGACCTCCCAGTGTAGCCATG-3'                         |                          |                                 |
| <b>RH2A</b>                     | <i>P. amboinensis</i> (91), <i>P. moluccensis</i> (94) | RH2A_forward_1           | 5'-CATTCTTGGACCCACTTTCTGCG-3'   |
|                                 |                                                        | RH2A_reverse_1           | 5'-CCAGAGAGCAACTTACCTCCA-3'     |
|                                 | <i>O. cyanosoma</i> (91)                               | RH2A_F2                  | 5'-ATGCAGGAGCTGGAGTTGCTTTC-3'   |
|                                 |                                                        | RH2A_R2                  | 5'-GGTACCTGGACCAGCCACC-3'       |
| <b>LWS</b>                      | <i>P. moluccensis</i>                                  | LWS_forward_1            | 5'-ACACCAATCACACCAAAGATCCC-3'   |
|                                 |                                                        | <i>P. amboinensis</i>    | LWS_forward_3                   |
|                                 | <i>P. amboinensis</i> (96), <i>P. moluccensis</i> (95) | LWS_reverse_2            | 5'-GACAAACATCCAGGCTGTGGC-3'     |
|                                 |                                                        | <i>O. cyanosoma</i> (96) | LWS_F2                          |
| LWS_R2                          | 5'-ATCATGTACGACTGGACTCCAGG-3'                          |                          |                                 |
| <b>RH1</b>                      | <i>P. amboinensis</i> (91), <i>P. moluccensis</i> (90) | RH1_forward_1            | 5'-CCACTGCATGATCACCACCT-3'      |
|                                 |                                                        | RH1_reverse_1            | 5'-GATGCTCCCTCCTTCTTCCG-3'      |
|                                 | <i>O. cyanosoma</i> (81)                               | RH1_F3                   | 5'-CCATCAGCAACTCCGCTTTGG-3'     |
|                                 |                                                        | RH1_R3                   | 5'-GGGGTACGGAGCAAGCAGC-3'       |

**Table S3:** Summary of total relative opsin expression under different colour treatments and after different treatment durations in the three investigated reef fish species. Values are given as median fraction of total single cone opsin (%) and interquartile range for each of the SWS cone opsins present in each respective species (*O. cyanosoma*: SWS2A $\alpha$ , SWS2A $\beta$ ; *P. amboinensis*/*P. moluccensis*: SWS1/SWS2B), as median fraction of total double cone opsin (RH2B, RH2A, LWS) and interquartile range, and as median fraction of cone and rod opsin of total opsin (%) and interquartile range.

| Species               | time spent in tank [months] | treatment | n        | Opsin gene |            |                |               |            |            |           |            |            |            |
|-----------------------|-----------------------------|-----------|----------|------------|------------|----------------|---------------|------------|------------|-----------|------------|------------|------------|
|                       |                             |           |          | SWS1       | SWS2B      | SWS2A $\alpha$ | SWS2A $\beta$ | RH2B       | RH2A       | LWS       | Total Cone | Total RH1  |            |
| <i>P. amboinensis</i> | 0                           | baseline  | 8        | 86.6, 9.6  | 13.4, 9.6  | -              | -             | 45.0, 4.0  | 54.5, 3.9  | 0.4, 0.4  | 58.7, 6.5  | 41.3, 6.5  |            |
|                       | 1                           | blue      | 5        | 84.2, 6.1  | 15.8, 6.1  | -              | -             | 45.4, 2.4  | 53.4, 1.6  | 1.3, 0.2  | 64.4, 3.1  | 35.6, 3.1  |            |
|                       |                             | green     | 13       | 68.4, 4.1  | 31.6, 4.1  | -              | -             | 46.6, 5.4  | 46.6, 6.6  | 1.1, 4.9  | 63.9, 7.5  | 36.1, 7.5  |            |
|                       |                             | red       | 4        | 68.8, 13.2 | 31.2, 13.2 | -              | -             | 46.0, 2.6  | 52.8, 1.8  | 1.1, 0.4  | 63.2, 4.5  | 36.8, 4.5  |            |
|                       | 6                           | blue      | 5        | 75.7, 3.5  | 24.3, 3.5  | -              | -             | 45.6, 1.0  | 53.9, 0.9  | 0.5, 0.4  | 52.9, 6.1  | 47.1, 6.1  |            |
|                       |                             | green     | 5        | 58.8, 12.9 | 41.2, 12.9 | -              | -             | 44.5, 4.4  | 54.5, 5.0  | 0.6, 0.6  | 56.3, 9.1  | 43.7, 9.1  |            |
|                       |                             | red       | 5        | 45.8, 12.2 | 54.2, 12.2 | -              | -             | 45.3, 1.7  | 54.2, 1.0  | 0.6, 0.2  | 47.6, 7.9  | 52.4, 7.9  |            |
|                       | <i>P. moluccensis</i>       | 0         | baseline | 18         | 85.0, 12.5 | 15.0, 12.5     | -             | -          | 43.4, 3.1  | 52.2, 2.7 | 3.6, 2.1   | 63.2, 11.0 | 46.8, 11.0 |
|                       |                             | 1         | blue     | 3          | 87.8, 12.4 | 12.2, 12.4     | -             | -          | 44.3, 1.5  | 49.6, 1.4 | 6.6, 2.6   | 62.6, 1.8  | 37.4, 1.8  |
| green                 |                             |           | 3        | 56.1, 8.9  | 43.9, 8.9  | -              | -             | 40.6, 2.0  | 50.8, 0.8  | 8.7, 2.7  | 58.3, 2.2  | 41.7, 2.2  |            |
| red                   |                             |           | 3        | 57.3, 6.2  | 42.7, 6.2  | -              | -             | 41.7, 4.0  | 51.3, 3.9  | 5.1, 1.0  | 56.6, 5.3  | 33.4, 5.3  |            |
| no filter             |                             |           | 6        | 69.1, 21.9 | 30.9, 21.9 | -              | -             | 45.5, 2.1  | 49.0, 2.6  | 6.3, 2.2  | 65.7, 15.5 | 34.3, 15.5 |            |
| 0.15 ND               |                             |           | 6        | 69.8, 14.4 | 30.2, 14.4 | -              | -             | 47.0, 2.4  | 48.4, 2.6  | 5.5, 4.0  | 55.1, 8.2  | 44.9, 8.2  |            |
| 0.6 ND                |                             |           | 5        | 55.5, 5.2  | 44.5, 5.2  | -              | -             | 44.2, 2.0  | 50.1, 1.2  | 6.1, 3.3  | 61.3, 0.7  | 38.7, 0.7  |            |
| 6                     |                             | blue      | 3        | 70.3, 5.9  | 29.7, 5.9  | -              | -             | 43.5, 1.0  | 49.8, 1.3  | 5.0, 1.3  | 51.0, 11.4 | 49.0, 11.4 |            |
|                       |                             | green     | 5        | 59.6, 14.3 | 40.4, 14.3 | -              | -             | 41.5, 0.9  | 52.4, 0.3  | 6.1, 1.0  | 53.1, 3.3  | 46.9, 3.3  |            |
|                       |                             | red       | 9        | 66.6, 25.9 | 33.4, 25.9 | -              | -             | 41.5, 3.6  | 49.9, 4.4  | 6.0, 2.6  | 62.3, 12.1 | 37.7, 12.1 |            |
| <i>O. cyanosoma</i>   |                             | 0         | baseline | 18         | -          | -              | 9.4, 7.5      | 90.6, 7.5  | 17.1, 8.5  | 82.5, 8.6 | 0.4, 0.9   | 91.2, 3.9  | 8.8, 3.9   |
|                       |                             | 1         | blue     | 8          | -          | -              | 9.4, 5.5      | 90.6, 5.5  | 16.5, 8.9  | 83.0, 8.5 | 0.7, 0.5   | 92.8, 0.8  | 7.2, 0.8   |
|                       | green                       |           | 7        | -          | -          | 6.2, 5.7       | 93.8, 5.7     | 14.5, 2.9  | 84.6, 4.1  | 0.8, 0.7  | 93.4, 1.3  | 6.6, 1.3   |            |
|                       | red                         |           | 8        | -          | -          | 2.3, 2.4       | 97.7, 2.4     | 13.1, 5.1  | 86.6, 5.1  | 0.4, 0.2  | 92.9, 1.6  | 7.1, 1.6   |            |
|                       | no filter                   |           | 6        | -          | -          | 16.6, 2.1      | 83.4, 2.1     | 33.4, 10.0 | 65.9, 9.4  | 0.5, 0.6  | 89.9, 3.3  | 10.1, 3.3  |            |
|                       | 0.15 ND                     |           | 10       | -          | -          | 16.7, 17.9     | 83.3, 17.9    | 20.5, 12.5 | 78.6, 11.3 | 0.4, 1.0  | 91.3, 1.3  | 8.7, 1.3   |            |
|                       | 0.6 ND                      |           | 7        | -          | -          | 13.9, 9.3      | 86.1, 9.3     | 42.0, 20.0 | 57.9, 19.7 | 0.1, 0.3  | 91.1, 5.6  | 8.9, 5.6   |            |
|                       | 4                           | blue      | 8        | -          | -          | 11.3, 5.6      | 88.7, 5.6     | 4.1, 5.6   | 94.3, 6.6  | 1.5, 1.7  | 94.9, 1.5  | 5.1, 1.5   |            |
|                       |                             | green     | 5        | -          | -          | 9.0, 6.4       | 91.0, 6.4     | 6.1, 6.2   | 92.2, 7.2  | 1.2, 0.5  | 95.5, 0.3  | 3.5, 0.3   |            |
|                       |                             | red       | 5        | -          | -          | 3.3, 1.7       | 96.7, 1.7     | 3.3, 3.9   | 95.4, 3.4  | 0.6, 0.5  | 94.8, 1.1  | 5.2, 1.1   |            |

**Table S4:** Summary of beta regression models showing results for baseline datasets tested against light treatments (blue, green, red, no filter, ND0.15, ND0.6) after different time points, and results for no filter datasets tested against light treatments (blue, green, red, ND0.15, ND0.6). After Bonferroni-Correction for six (baseline dataset) respectively five (no filter dataset) tested treatment hypotheses ( $p = \alpha/m$ , with  $m=6$  resp. 5),  $p$ -values less than or equal to 0.0083, 0.0017, and 0.00017 resp.  $p$ -values less than or equal to 0.01, 0.002, and 0.0002 were considered significant and are marked with \*, \*\*, or \*\*\*, respectively. Statistically significant  $P$ -values are shown in bold.

| species               | time spent in tank [months] | light & control treatment | opsin gene         |                    |                    |                    |                    |                    |                    |                    |       |
|-----------------------|-----------------------------|---------------------------|--------------------|--------------------|--------------------|--------------------|--------------------|--------------------|--------------------|--------------------|-------|
|                       |                             |                           | SWS1               | SWS2B              | SWS2A $\alpha$     | SWS2A $\beta$      | RH2B               | RH2A               | LWS                | RH1                |       |
|                       |                             |                           | baseline           |       |
| <i>P. amboinensis</i> | 1                           | blue                      | 0.385              | 0.385              | n/a                | n/a                | 0.508              | 0.865              | <b>0.002*</b>      | 0.337              |       |
|                       |                             | green                     | <b>2.77E-08***</b> | <b>2.77E-08***</b> | n/a                | n/a                | 0.09               | <b>0.004*</b>      | <b>0.007*</b>      | 0.277              |       |
|                       |                             | red                       | <b>7.02E-05***</b> | <b>7.02E-05***</b> | n/a                | n/a                | 0.404              | 0.245              | 0.009              | 0.194              |       |
|                       | 6                           | blue                      | <b>1.05E-04***</b> | <b>1.05E-04***</b> | n/a                | n/a                | 0.922              | 0.982              | 0.169              | 0.071              |       |
|                       |                             | green                     | <b>1.01E-14***</b> | <b>1.01E-14***</b> | n/a                | n/a                | 0.78               | 0.676              | 0.046              | 0.091              |       |
|                       |                             | red                       | <b>2.67E-13***</b> | <b>2.67E-13***</b> | n/a                | n/a                | 0.697              | 0.823              | 0.999              | 0.015              |       |
| <i>P. moluccensis</i> | 1                           | blue                      | 0.947              | 0.947              | n/a                | n/a                | 0.465              | 0.16               | 0.715              | 0.683              |       |
|                       |                             | green                     | <b>1.85E-05***</b> | <b>1.85E-05***</b> | n/a                | n/a                | 0.108              | 0.452              | <b>2.23E-04**</b>  | 0.222              |       |
|                       |                             | red                       | <b>5.83E-06***</b> | <b>5.83E-06***</b> | n/a                | n/a                | 0.902              | 0.22               | 0.009              | 0.126              |       |
|                       |                             | no filter                 | <b>7.65E-04**</b>  | <b>7.65E-04**</b>  | n/a                | n/a                | 0.09               | <b>7.68E-04**</b>  | <b>0.002*</b>      | 0.349              |       |
|                       |                             | 0.15 ND                   | <b>4.00E-05***</b> | <b>4.00E-05***</b> | n/a                | n/a                | 0.019              | <b>6.13E-04**</b>  | 0.13               | 0.044              |       |
|                       |                             | 0.6 ND                    | <b>3.5E-10***</b>  | <b>3.5E-10***</b>  | n/a                | n/a                | 0.414              | 0.051              | 0.05               | 0.257              |       |
|                       | 6                           | blue                      | 0.01               | 0.01               | n/a                | n/a                | 0.863              | 0.151              | <b>0.008*</b>      | 0.076              |       |
|                       |                             | green                     | <b>4.96E-09***</b> | <b>4.96E-09***</b> | n/a                | n/a                | 0.235              | 0.849              | <b>0.006*</b>      | <b>7.38E-05***</b> |       |
|                       |                             | red                       | <b>3.64E-04**</b>  | <b>3.64E-04**</b>  | n/a                | n/a                | 0.14               | 0.12               | <b>8.25E-08***</b> | 0.058              |       |
|                       | <i>O. cyanosoma</i>         | 1                         | blue               | n/a                | n/a                | 0.521              | 0.521              | 0.63               | 0.602              | 0.357              | 0.204 |
|                       |                             |                           | green              | n/a                | n/a                | 0.109              | 0.109              | 0.204              | 0.213              | 0.145              | 0.076 |
|                       |                             |                           | red                | n/a                | n/a                | <b>1.74E-05***</b> | <b>1.74E-05***</b> | 0.184              | 0.134              | 0.527              | 0.416 |
| no filter             |                             |                           | n/a                | n/a                | <b>0.003*</b>      | <b>0.003*</b>      | <b>1.01E-04***</b> | <b>9.68E-05***</b> | 0.75               | 0.417              |       |
| 0.15 ND               |                             |                           | n/a                | n/a                | <b>0.002*</b>      | <b>0.002*</b>      | 0.627              | 0.609              | 0.834              | 0.707              |       |
| 0.6 ND                |                             |                           | n/a                | n/a                | 0.343              | 0.343              | <b>0.003*</b>      | <b>0.003*</b>      | <b>0.001*</b>      | 0.156              |       |
| 4                     |                             | blue                      | n/a                | n/a                | 0.227              | 0.227              | <b>2.41E-04**</b>  | <b>7.62E-04**</b>  | 0.029              | 0.015              |       |
|                       |                             | green                     | n/a                | n/a                | 0.736              | 0.736              | <b>0.002*</b>      | <b>0.002*</b>      | 0.029              | 0.011              |       |
|                       |                             | red                       | n/a                | n/a                | <b>2.01E-04**</b>  | <b>2.01E-04**</b>  | <b>3.43E-05***</b> | <b>2.73E-05***</b> | 0.836              | 0.013              |       |
|                       |                             |                           | <b>no filter</b>   |                    |       |
| <i>P. moluccensis</i> | 1                           | blue                      | 0.046              | 0.046              | n/a                | n/a                | 0.514              | 0.18               | 0.306              |                    |       |
|                       |                             | green                     | 0.183              | 0.183              | n/a                | n/a                | <b>0.002*</b>      | 0.03               | 0.349              |                    |       |
|                       |                             | red                       | 0.121              | 0.121              | n/a                | n/a                | 0.365              | 0.304              | 0.995              |                    |       |
|                       |                             | 0.15 ND                   | 0.606              | 0.606              | n/a                | n/a                | 0.435              | 0.528              | 0.477              |                    |       |
|                       |                             | 0.6 ND                    | 0.011              | 0.011              | n/a                | n/a                | 0.323              | 0.259              | 0.591              |                    |       |
| <i>O. cyanosoma</i>   | 1                           | blue                      | n/a                | n/a                | <b>5.44E-04**</b>  | <b>5.44E-04**</b>  | <b>1.25E-08***</b> | <b>9.86E-09***</b> | 0.147              |                    |       |
|                       |                             | green                     | n/a                | n/a                | <b>3.34E-06***</b> | <b>3.34E-06***</b> | <b>6.49E-09***</b> | <b>8.03E-09***</b> | 0.061              |                    |       |
|                       |                             | red                       | n/a                | n/a                | <b>2.97E-14***</b> | <b>2.97E-14***</b> | <b>4.52E-12***</b> | <b>7.63E-13***</b> | 0.748              |                    |       |
|                       |                             | 0.15 ND                   | n/a                | n/a                | <b>0.004*</b>      | <b>0.004*</b>      | <b>5.7E-04**</b>   | <b>3.44E-04**</b>  | 0.895              |                    |       |
|                       |                             | 0.6 ND                    | n/a                | n/a                | 0.178              | 0.178              | 0.782              | 0.751              | 0.037              |                    |       |

**Table S5:** Overview of sites and site effects considered for  $\lambda_{\max}$ -calculations for *Pomacentrus moluccensis*, *P. amboinensis*, and *Ostorhinchus cyanosoma*. Bottom site numbers indicate amino acid residue position of Bovine rhodopsin, top site numbers indicate amino acid (AA) residue position in the target genes. All site effects and overall sensitivities are given in nm. AA changes in sites that our  $\lambda_{\max}$ -calculations are based on are highlighted in blue, and are either known tuning sites (SWS2B W265Y, SWS2A $\beta$  S94A, LWS S164A, LWS Y261F: Lin et al., 1998; Takahashi and Ebrey, 2003; Yokoyama, 2008; Dungan et al., 2016) or in close vicinity (RH2B C157V: Chan et al., 1992; Wilkie et al., 2000), are estimated on MSP measurements (SWS2A $\alpha$  L216F; RH2B I49C, RH2B S109G, LWS: Cortesi et al., 2015; Spady et al., 2006; Siebeck et al., 2010; Losey et al., 2003; Stieb et al., 2016), or are based on a change in polarity (RH2B C98A, RH2B S124A, RH2A F158/166L, RH2A F158/166A).

SWS2B

| Species                     | Variable site |    |     |     |     |     | Estimated tuning effect (nm) |    |    |     |     | Estimate (nm) | Actual I <sub>max</sub> (nm) | MSP |     |                                 |
|-----------------------------|---------------|----|-----|-----|-----|-----|------------------------------|----|----|-----|-----|---------------|------------------------------|-----|-----|---------------------------------|
|                             | 49            | S2 | 124 | 169 | 174 | 209 | 271                          | 49 | S2 | 124 | 169 |               |                              |     | 174 | 271                             |
| <i>P. moluccensis</i> SWS2B | F             | F  | T   | F   | A   | Y   | Y                            | 0  | 0  | 0   | 0   | 174           | 271                          | -15 | 408 | (404 - 410 in other damselfish) |
| <i>P. amboinensis</i> SWS2B | F             | F  | T   | F   | A   | Y   | Y                            | 0  | 0  | 0   | 0   |               |                              | -15 | 408 |                                 |
| <i>P. fuscus</i> SWS2B      | F             | F  | T   | C   | A   | Y   | W                            | 0  | 0  | 0   | 0   |               |                              | 0   | 423 |                                 |
| <i>M. zebra</i> SWS2B       | F             | F  | T   | C   | A   | Y   | W                            | 0  | 0  | 0   | 0   |               |                              | 0   | 423 |                                 |
| <i>O. niloticus</i> SWS2B   | F             | F  | T   | C   | A   | Y   | W                            | 0  | 0  | 0   | 0   |               |                              | 0   | 423 |                                 |
| <i>O. latipes</i> SWS2B     | L             | V  | A   | C   | S   | Y   | Y                            | -3 | 6  | -10 | 0   | 4             |                              | -15 | 405 |                                 |
| <i>L. goodei</i> SWS2B      | L             | F  | G   | F   | T   | Y   | Y                            | -3 | 0  | -10 | 0   | 2             |                              | -15 | 397 |                                 |
| Bovine RH1                  | Y             | L  | T   | M   | A   | F   | W                            |    |    |     |     |               |                              |     |     |                                 |
|                             | 43            | 46 | 118 | 163 | 168 | 203 | 265                          | 43 | 46 | 118 | 163 | 168           | 265                          |     |     |                                 |

SWS2A

| Species                            | Variable site |    |    |     |     |     |     |     |     |     | Estimated tuning effect (nm) |    |    |     |     |     |     |     |     |     | Estimate (nm) | Actual I <sub>max</sub> (nm) |     |   |    |   |     |     |     |
|------------------------------------|---------------|----|----|-----|-----|-----|-----|-----|-----|-----|------------------------------|----|----|-----|-----|-----|-----|-----|-----|-----|---------------|------------------------------|-----|---|----|---|-----|-----|-----|
|                                    | 47            | 49 | 88 | 100 | 115 | 169 | 174 | 222 | 275 | 298 | 305                          | 47 | 49 | 100 | 115 | 169 | 174 | 222 | 275 | 298 |               |                              | 305 |   |    |   |     |     |     |
| <i>O. cyanosoma</i> SWS2A $\alpha$ | A             | F  | A  | A   | A   | F   | A   | F   | A   | S   | A                            | 0  | 0  | 0   | 0   | 0   | 0   | 0   | 0   | 0   | 0             | 0                            | 0   | 0 | 0  | 0 | 448 |     |     |
| <i>P. fuscus</i> SWS2A $\alpha$    | A             | F  | A  | A   | A   | F   | S   | F   | A   | S   | A                            | 0  | 0  | 0   | 0   | 0   | 0   | 0   | 0   | 0   | 0             | 0                            | 0   | 0 | 0  | 0 | 448 | 448 |     |
| <i>M. zebra</i> SWS2A              | A             | F  | A  | A   | A   | F   | S   | L   | A   | S   | A                            | 0  | 0  | 0   | 0   | 0   | 0   | 0   | 0   | 0   | 0             | 0                            | 0   | 0 | 0  | 0 | 456 |     |     |
| <i>O. niloticus</i> SWS2A          | A             | F  | A  | A   | A   | F   | S   | L   | A   | S   | A                            | 0  | 0  | 0   | 0   | 0   | 0   | 0   | 0   | 0   | 0             | 0                            | 0   | 0 | 0  | 0 | 456 | 456 |     |
| <i>L. goodei</i> SWS2A             | A             | Y  | A  | A   | A   | F   | S   | L   | A   | A   | T                            | 0  | 0  | 0   | 0   | 0   | 0   | 0   | 0   | 0   | 0             | 0                            | 0   | 0 | 8  | 2 | 460 | 448 |     |
| <i>O. latipes</i> SWS2A            | A             | F  | A  | A   | A   | C   | A   | F   | A   | S   | T                            | 0  | 0  | 0   | 0   | 0   | 0   | 0   | 0   | 0   | 0             | 0                            | 0   | 0 | -8 | 0 | 2   | 450 | 439 |
| <i>O. cyanosoma</i> SWS2A $\beta$  | S             | Y  | S  | T   | V   | I   | S   | L   | A   | S   | A                            | 0  | 0  | 0   | 14  | -2  | 0   | 0   | 0   | 0   | 0             | 0                            | 0   | 0 | 0  | 0 | 468 |     |     |
| <i>P. fuscus</i> SWS2A $\beta$     | A             | F  | A  | A   | A   | F   | S   | L   | T   | S   | A                            | 0  | 0  | 0   | 0   | 0   | 0   | 0   | 0   | 0   | 0             | 0                            | 0   | 6 | 0  | 2 | 464 | 457 |     |
| Bovine RH1                         | A             | Y  | A  | L   | A   | A   | A   |     |     |     |                              |    |    |     |     |     |     |     |     |     |               |                              |     |   |    |   |     |     |     |
|                                    | 41            | 43 | 82 | 94  | 109 | 163 | 168 | 216 | 269 | 292 | 299                          | 41 | 43 | 94  | 109 | 163 | 168 | 216 | 269 | 292 | 299           |                              |     |   |    |   |     |     |     |

RH2B

| Species                    | Variable site |    |    |    |    |     |     |     | Estimated tuning effect (nm) |     |    |    |     |    |    |     | Estimate (nm) | Actual I <sub>max</sub> (nm) |     |     |     |     |     |   |   |     |     |     |
|----------------------------|---------------|----|----|----|----|-----|-----|-----|------------------------------|-----|----|----|-----|----|----|-----|---------------|------------------------------|-----|-----|-----|-----|-----|---|---|-----|-----|-----|
|                            | 45            | 50 | 95 | 96 | 99 | 110 | 125 | 158 | 204                          | 293 | 45 | 50 | 95  | 96 | 99 | 110 |               |                              | 125 | 158 | 204 | 293 |     |   |   |     |     |     |
| <i>O. cyanosoma</i> RH2B   | M             | C  | T  | F  | A  | G   | A   | V   | Y                            | A   | 0  | 0  | 0   | 0  | 0  | -2  | 8             | -2                           | -2  | 0   | 0   | 0   | 0   | 0 | 0 | 0   | 474 |     |
| <i>P. amboinensis</i> RH2B | M             | C  | T  | I  | C  | G   | S   | C   | Y                            | A   | 0  | 0  | 0   | 0  | 0  | 0   | 8             | 0                            | 0   | 0   | 0   | 0   | 0   | 0 | 0 | 0   | 480 | 480 |
| <i>P. moluccensis</i> RH2B | M             | C  | T  | I  | C  | G   | S   | C   | Y                            | A   | 0  | 0  | 0   | 0  | 0  | 0   | 8             | 0                            | 0   | 0   | 0   | 0   | 0   | 0 | 0 | 0   | 480 |     |
| <i>O. niloticus</i> RH2B   | M             | I  | T  | I  | C  | S   | S   | C   | Y                            | A   | 0  | 0  | 0   | 0  | 0  | 0   | 0             | 0                            | 0   | 0   | 0   | 0   | 0   | 0 | 0 | 0   | 472 | 472 |
| <i>M. zebra</i> RH2B       | I             | I  | T  | I  | C  | S   | S   | C   | Y                            | A   | 0  | 0  | 0   | 0  | 0  | 0   | 0             | 0                            | 0   | 0   | 0   | 0   | 0   | 0 | 0 | 0   | 484 |     |
| <i>O. latipes</i> RH2A     | M             | L  | C  | I  | C  | G   | S   | C   | F                            | S   | 0  | 0  | -10 | 0  | 0  | 0   | 0             | 0                            | 0   | 0   | -1  | -8  | 453 |   | 0 | 452 |     |     |
| Bovine RH1                 | M             | M  | T  | L  | S  | G   | A   | V   | F                            | A   |    |    |     |    |    |     |               |                              |     |     |     |     |     |   |   |     |     |     |
|                            | 44            | 49 | 94 | 95 | 98 | 109 | 124 | 157 | 203                          | 292 | 44 | 49 | 94  | 95 | 98 | 109 | 124           | 157                          | 203 | 292 |     |     |     |   |   |     |     |     |

RH2A

| Species                    | Variable site |     |     | Estimated tuning effect (nm) |     |     | Estimate (nm) | Actual I <sub>max</sub> (nm) |
|----------------------------|---------------|-----|-----|------------------------------|-----|-----|---------------|------------------------------|
|                            | 117           | 166 | 298 | 117                          | 166 | 298 |               |                              |
| <i>O. cyanosoma</i> RH2A   | A             | A   | I   | 0                            | 0   | 0   | 518           |                              |
| <i>P. amboinensis</i> RH2A | F             | I   | L   | 0                            | 0   | 0   | 518           |                              |
| <i>P. moluccensis</i> RH2A | F             | I   | L   | 0                            | 0   | 0   | 518           |                              |
| <i>M. zebra</i> RH2Aa      | F             | F   | L   | 0                            | 10  | 0   |               | 528                          |
| <i>O. niloticus</i> RH2Aa  | F             | F   | L   | 0                            | 10  | 0   |               | 528                          |
| <i>M. zebra</i> RH2Ab      | F             | L   | I   | 0                            | 0   | 0   |               | 518                          |
| <i>O. niloticus</i> RH2Ab  | F             | L   | I   | 0                            | 0   | 0   |               | 518                          |
| Bovine RH1                 | G             | A   | I   |                              |     |     |               |                              |
|                            | 109           | 158 | 290 | 109                          | 158 | 290 |               |                              |

LWS

| Species                   | Variable Site |     | Tuning effect (nm) |     | Estimate (nm) | Actual I <sub>max</sub> (nm) |
|---------------------------|---------------|-----|--------------------|-----|---------------|------------------------------|
|                           | 177           | 274 | 177                | 274 |               |                              |
| <i>O. cyanosoma</i> LWS   | A             | F   | -7                 | -10 | 544           |                              |
| <i>P. amboinensis</i> LWS | A             | Y   | -7                 | 0   | 554           |                              |
| <i>P. moluccensis</i> LWS | A             | Y   | -7                 | 0   | 554           |                              |
| <i>O. niloticus</i> LWS   | S             | Y   | 0                  | 0   | 561           | 561                          |
| <i>L. goodei</i> LWS      | S             | Y   | 0                  | 0   | 561           | 573                          |
| <i>L. goodei</i> LWS      | S             | Y   |                    |     |               |                              |
| <i>O. latipes</i> LWS     | S             | Y   | 0                  | 0   | 561           |                              |
| <i>O. latipes</i> LWS     | S             | Y   | 0                  | 0   | 561           |                              |
| Bovine RH1                | A             | F   |                    |     |               |                              |
|                           | 164           | 261 | 164                | 261 |               |                              |

RH1

| Species                   | Variable site |     |     |     | Estimated tuning effect (nm) |     |     | Estimate (nm) | Actual I <sub>max</sub> (nm) |
|---------------------------|---------------|-----|-----|-----|------------------------------|-----|-----|---------------|------------------------------|
|                           | 83            | 168 | 298 | 299 | 83                           | 298 | 299 |               |                              |
| <i>O. cyanosoma</i> RH1   | N             | S   | S   | A   | -6                           | 0   | -2  | 494           |                              |
| <i>P. amboinensis</i> RH1 | N             | A   | S   | S   | -6                           | 0   | 0   | 496           |                              |
| <i>P. moluccensis</i> RH1 | N             | A   | S   | S   | -6                           | 0   | 0   | 496           |                              |
| <i>M. zebra</i> RH1       | D             | A   | A   | A   | 0                            | 8   | -2  | 508           |                              |
| <i>O. niloticus</i> RH1   | D             | A   | S   | S   | 0                            | 0   | 0   | 502           |                              |
| <i>L. goodei</i> RH1      | D             | A   | A   | S   | 0                            | 8   | 0   | 510           |                              |
| <i>O. latipes</i> RH1     | D             | A   | S   | S   | 0                            | 0   | 0   |               | 502                          |
| Bovine RH1                | D             | A   | S   | A   |                              |     |     |               |                              |
|                           | 83            | 168 | 298 | 299 | 83                           | 298 | 299 |               |                              |

## Supplementary literature cited

- Chan, T., Lee, M. and Sakmar, T. P.** (1992). Introduction of hydroxyl-bearing amino acids causes bathochromic spectral shifts in rhodopsin. Amino acid substitutions responsible for red-green color pigment spectral tuning. *J. Biol. Chem.* **267**, 9478–9480.
- Cortesi, F., Musilová, Z., Stieb, S. M., Hart, N. S., Siebeck, U. E., Malmstrøm, M., Tørresen, O. K., Jentoft, S., Cheney, K. L., Marshall, N. J., et al.** (2015). Ancestral duplications and highly dynamic opsin gene evolution in percomorph fishes. *Proc. Natl. Acad. Sci. U. S. A.* **112**, 1493–8.
- Dungan, S. Z., Kosyakov, A. and Chang, B. S. W.** (2016). Spectral tuning of killer whale (*Orcinus orca*) rhodopsin: Evidence for positive selection and functional adaptation in a cetacean visual pigment. *Mol. Biol. Evol.* **33**, 323–336.
- Lin, S. W., Kochendoerfer, G. G., Carroll, K. S., Wang, D., Mathies, R. A. and Sakmar, T. P.** (1998). Mechanisms of spectral tuning in blue cone visual pigments. Visible and raman spectroscopy of blue-shifted rhodopsin mutants. *J. Biol. Chem.* **273**, 24583–91.
- Losey, G. S., McFarland, W. N., Loew, E. R., Zamzow, J. P., Nelson, P. A. and Marshall, N. J.** (2003). Visual Biology of Hawaiian Coral Reef Fishes. I. Ocular Transmission and Visual Pigments.
- Spady, T. C., Parry, J. W. L., Robinson, P. R., Hunt, D. M., Bowmaker, J. K. and Carleton, K. L.** (2006). Evolution of the cichlid visual palette through ontogenetic subfunctionalization of the opsin gene arrays. *Mol. Biol. Evol.* **23**, 1538–47.
- Siebeck, U. E., Parker, A. N., Sprenger, D., Mäthger, L. M. and Wallis, G.** (2010). A species of reef fish that uses ultraviolet patterns for covert face recognition. *Curr. Biol.* **20**, 407–410.
- Stieb, S. M., Carleton, K. L., Cortesi, F., Marshall, N. J. and Salzburger, W.** (2016). Depth-dependent plasticity in opsin gene expression varies between damselfish (Pomacentridae) species. *Mol. Ecol.* **25**, 3645–3661.
- Takahashi, Y. and Ebrey, T. G.** (2003). Molecular basis of spectral tuning in the newt short wavelength sensitive visual pigment. *Biochemistry* **42**, 6025–6034.
- Wilkie, S. E., Robinson, P. R., Cronin, T. W., Poopalasundaram, S., Bowmaker, J. K. and Hunt, D. M.** (2000). Spectral tuning of avian violet- and ultraviolet-sensitive visual pigments. *Biochemistry* **39**, 7895–7901.
- Yokoyama, S.** (2008). Evolution of dim-light and color vision pigments. *Annu. Rev. Genomics Hum. Genet.* **9**, 259–82.
